# Supplementary material
Source: publisher figshare collection journal article supplement (https://karger.figshare.com/articles/dataset/_/5241907)
Supplement: Supplementary file 1 [file 1]

## Erratum

---

In the article by Mizuma et al., entitled 'Influence of omalizumab on allergen-specific IgE in patients with adult asthma' [Int Arch Allergy Immunol 2015;168:165–172, DOI: 10.1159/000442668], the third last author's name was misspelt and should read Matsukura.
