# Supplementary material
Source: publisher figshare collection journal article supplement (https://karger.figshare.com/articles/dataset/_/5241907)
Supplement: Supplementary file 2 [file 1 › 000442668_sm_Suppl._Material.doc]

Table S1. Raw data for tIgE and sIgE before and after omalizumab treatment. The samples shown in boldface indicate those who had negative-to-positive seroconversion 


Table S2. The differences in ∆tIgE and ∆sIgE between the early time-point and late time-point groups


Fig. S1. Percent increase in sIgE after omalizumab treatment. Percent increases in sIgE were calculated using the following formula: (post sIgE – pre sIgE)/pre sIgE × 100.
